# Supplementary material
Source: publisher figshare collection journal article supplement (https://tandf.figshare.com/articles/dataset/_/11389830)
Supplement: Supplementary file 1 [file 1]

Archive with 3 entries (3 files):
- cjas_a_1702929_sm7315.pdf
- cjas_a_1702929_sm7314.pdf
- cjas_a_1702929_sm7311.pdf
