# Supplementary material
Source: publisher figshare collection journal article supplement (https://tandf.figshare.com/articles/dataset/_/11389830)

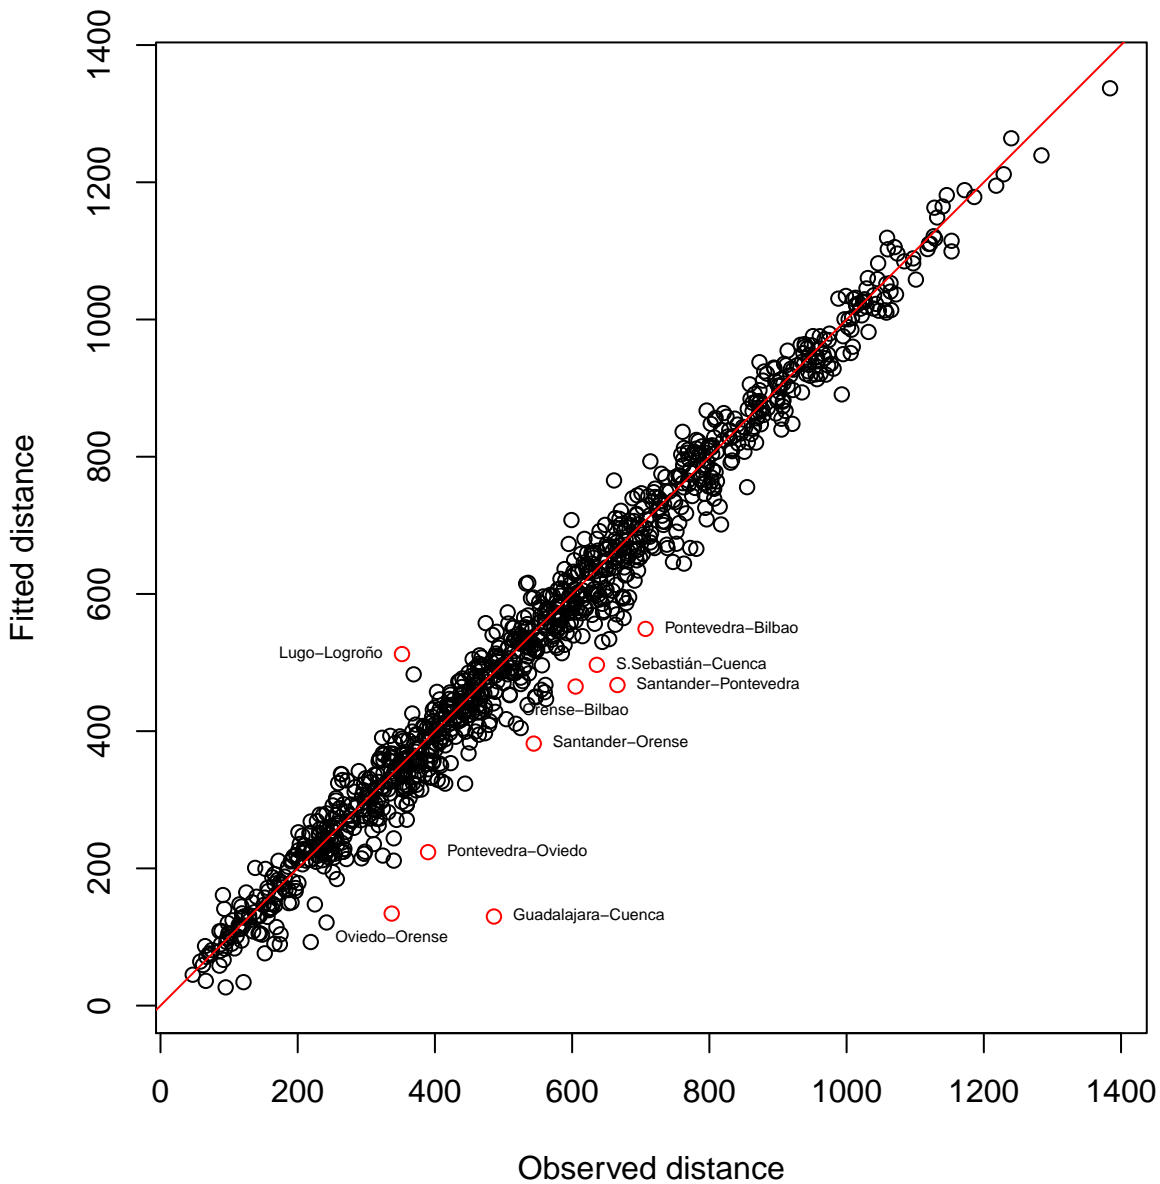

Supplement: Supplementary file 1 [file 1 › cjas_a_1702929_sm7315.pdf]

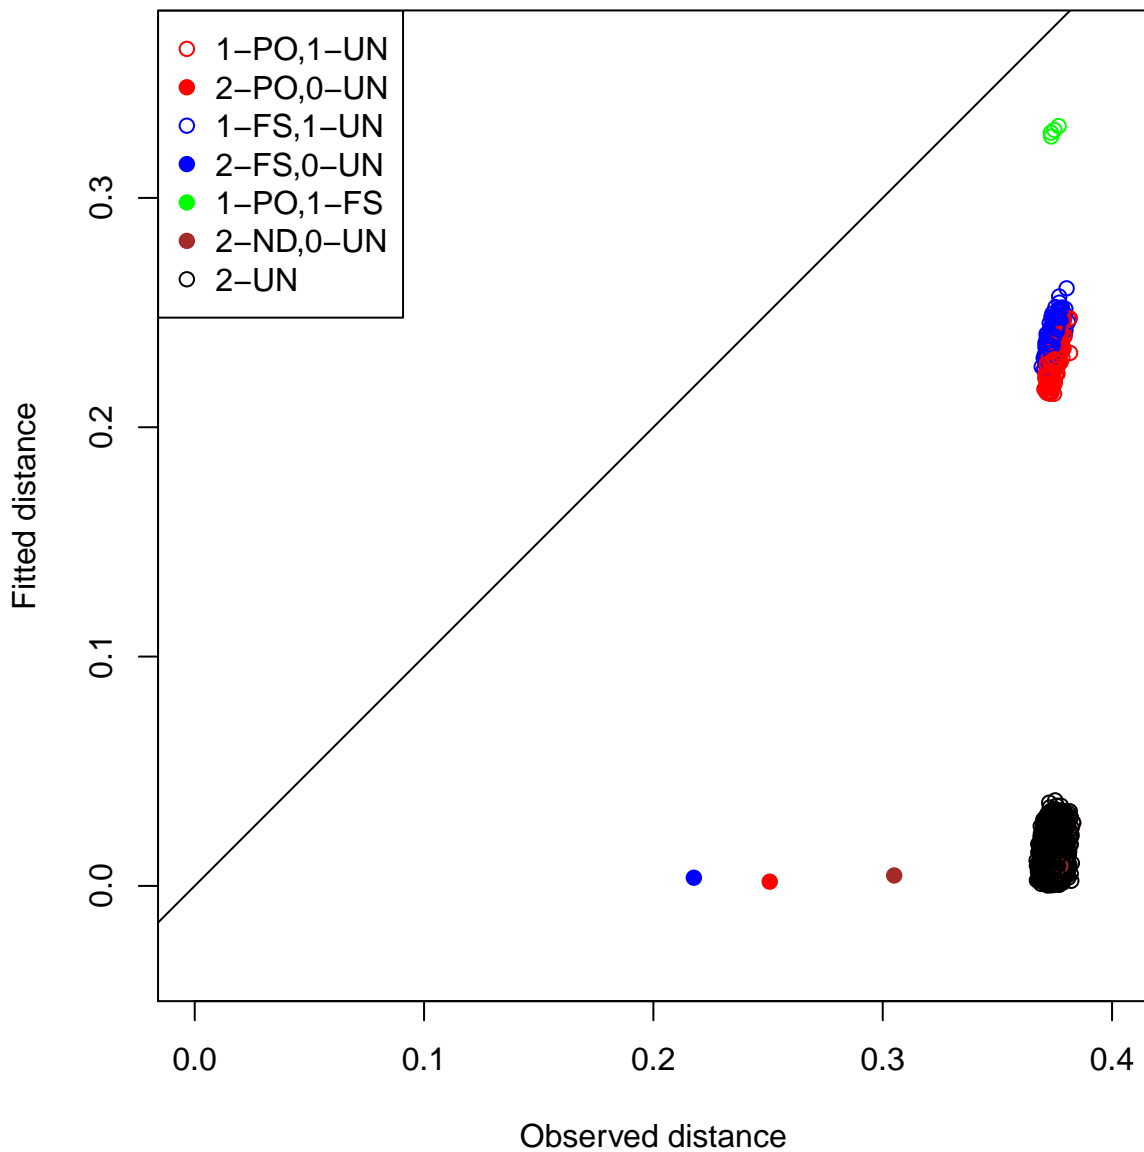

Supplement: Supplementary file 1 [file 1 › cjas_a_1702929_sm7314.pdf]

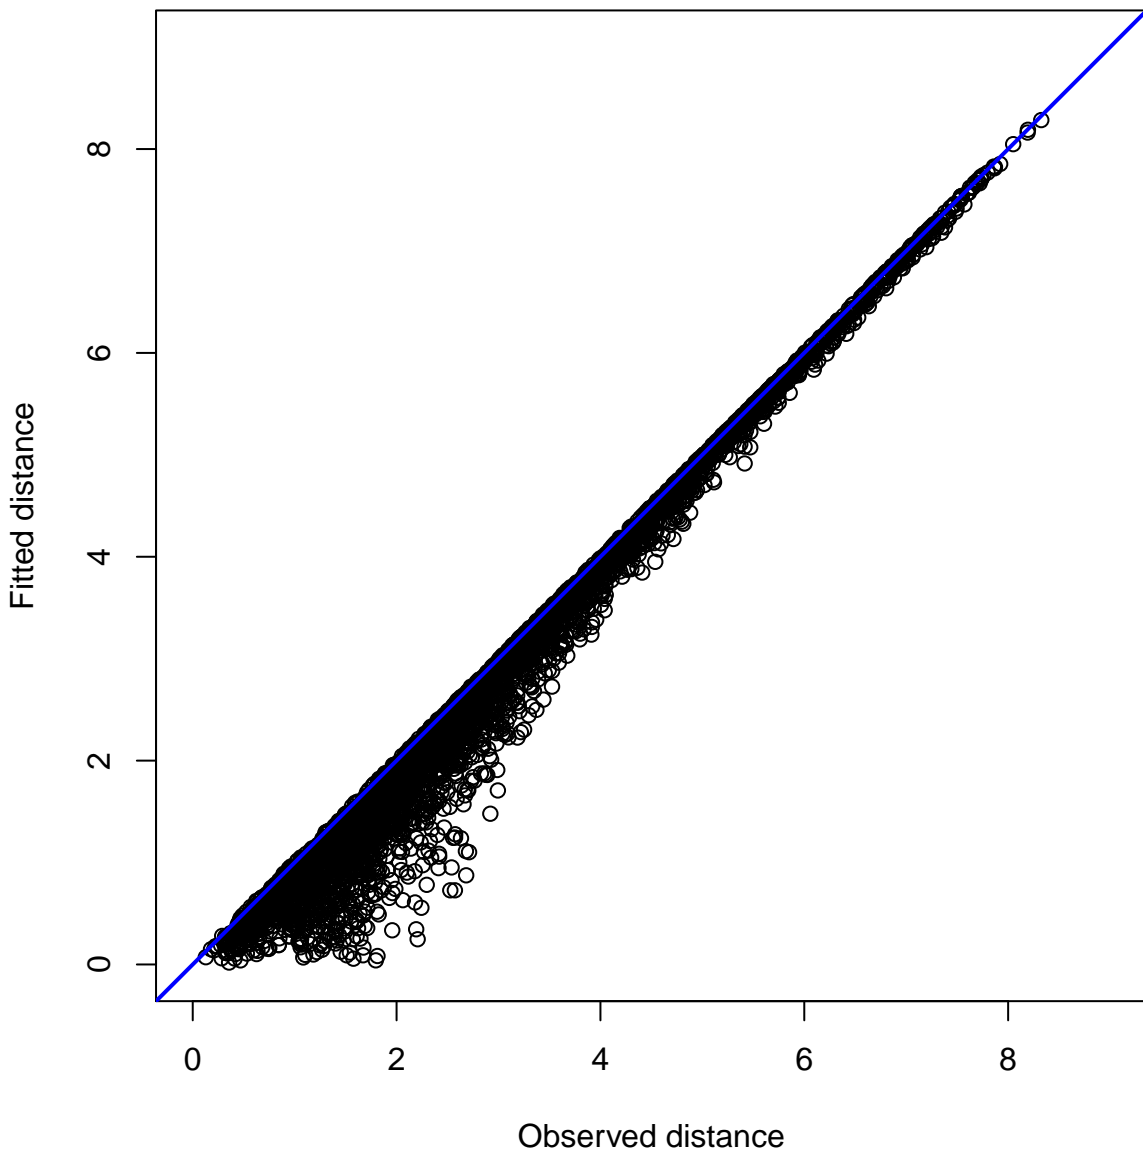

Supplement: Supplementary file 1 [file 1 › cjas_a_1702929_sm7311.pdf]
